# Supplementary material for: Meta-Analysis of VTE Risk: Ovarian Cancer Patients by Stage, Histology, Cytoreduction, and Ascites at Diagnosis
Source: Hindawi journal article supplement (doi:10.1155/2020/2374716), 2020-09-03
Supplement: f1 [file 2374716.f1.pdf]

Supplemental Figure 1. Funnel Plot of all included exposures

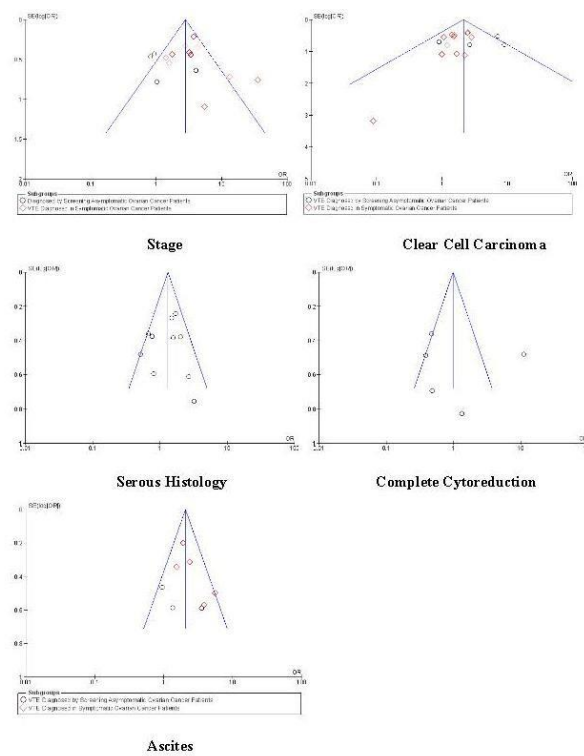

This figure shows the funnel plots for all exposures. There is mild asymmetry indicating publication bias cannot be ruled out.
